# Supplementary material
Source: Royal Society of Chemistry journal article supplement (doi:10.1039/d6cp00089d)
Supplement: d6cp00089d1.pdf [file d6cp00089d1.pdf]

**Supplemental Information: ED Model for Density-Functional Prediction of Vibrational Free Energies of Molecular Crystals**

Cameron J. Nickerson<sup>1</sup> and Erin R. Johnson<sup>1,2,3, a)</sup>

<sup>1)</sup> *Department of Physics and Atmospheric Science, Dalhousie University, 6310 Coburg Road, Halifax, Nova Scotia, Canada, B3H 4R2*

<sup>2)</sup> *Department of Chemistry, Dalhousie University, 6243 Alumni Crescent, Halifax, Nova Scotia, Canada, B3H 4R2*

<sup>3)</sup> *Yusuf Hamied Department of Chemistry, University of Cambridge Lensfield Road, Cambridge, UK, CB2 1EW*

(Dated: 10 March 2026)

---

<sup>a)</sup> Electronic mail: erin.johnson@dal.ca

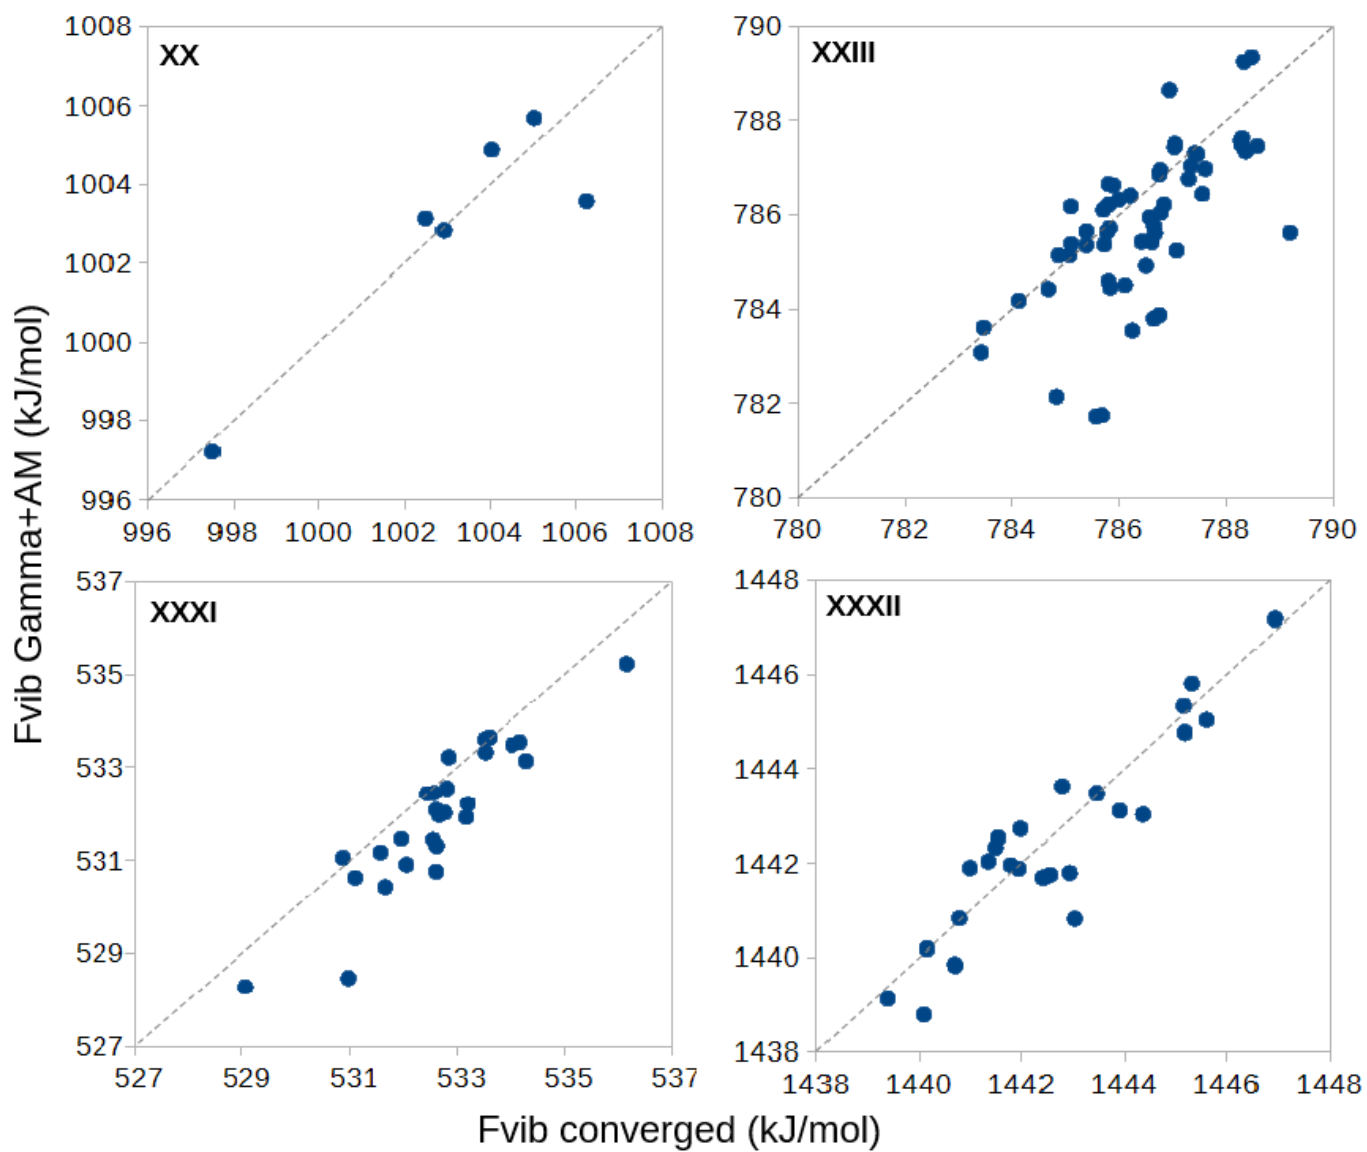

FIG. 1. Comparison of  $F_{\text{vib}}$  values between Einstein-Debye and converged phonons for each of the blind test molecules.

TABLE I. Vibrational free energies and DFT lattice energies, in kJ/mol per molecule, for the PV17 set of polymorph pairs. Supercell dimensions represent the number of times the unit cell is replicated along the  $a$ ,  $b$ , and  $c$  lattice vectors.

| Refcode  | $\Gamma$ | ED     | Converged | $E_{\text{DFT}}$ | Supercell dimensions  | # of atoms in supercell | # of displacements |
|----------|----------|--------|-----------|------------------|-----------------------|-------------------------|--------------------|
| CUMMIG01 | 288.0    | 282.4  | 284.1     | -613114.4        | $3 \times 1 \times 3$ | 252                     | 42                 |
| CUMMIG02 | 286.9    | 280.9  | 282.6     | -613109.5        | $2 \times 4 \times 2$ | 448                     | 42                 |
| DAVVUR   | 1173.4   | 1160.4 | 1160.2    | -3438863.1       | $1 \times 2 \times 3$ | 348                     | 174                |
| DAVVUR01 | 1177.6   | 1164.5 | 1163.4    | -3438866.7       | $2 \times 2 \times 2$ | 464                     | 174                |
| EFUMAU   | 316.4    | 313.2  | 314.5     | -558625.7        | $2 \times 3 \times 1$ | 336                     | 84                 |
| EFUMAU03 | 316.0    | 312.8  | 314.1     | -558624.7        | $2 \times 3 \times 2$ | 672                     | 168                |
| EFURIH   | 494.8    | 490.1  | 491.1     | -1806486.8       | $3 \times 2 \times 1$ | 288                     | 72                 |
| EFURIH04 | 496.0    | 490.7  | 491.4     | -1806493.6       | $3 \times 2 \times 2$ | 576                     | 144                |
| ETDIAM16 | 279.7    | 274.9  | 275.0     | -500732.6        | $2 \times 2 \times 2$ | 192                     | 36                 |
| ETDIAM18 | 281.0    | 276.6  | 276.4     | -500733.0        | $2 \times 2 \times 2$ | 192                     | 36                 |
| FUMAAC   | 191.4    | 188.4  | 190.5     | -1198070.3       | $3 \times 2 \times 2$ | 576                     | 144                |
| FUMAAC01 | 200.8    | 192.9  | 192.7     | -1198077.7       | $3 \times 2 \times 3$ | 216                     | 36                 |
| GICTIV   | 240.6    | 234.0  | 237.3     | -2633078.5       | $4 \times 1 \times 4$ | 640                     | 120                |
| GICTIV01 | 245.1    | 237.6  | 238.8     | -2633086.1       | $3 \times 3 \times 1$ | 360                     | 60                 |
| MALEHY10 | 209.1    | 204.3  | 204.4     | -1090256.6       | $3 \times 2 \times 2$ | 288                     | 72                 |
| MALEHY12 | 205.7    | 202.8  | 204.6     | -1090256.8       | $3 \times 3 \times 2$ | 864                     | 72                 |
| MALIAC12 | 192.5    | 189.6  | 191.0     | -1198058.0       | $3 \times 1 \times 2$ | 288                     | 72                 |
| MALIAC13 | 195.0    | 190.0  | 190.6     | -1198057.7       | $4 \times 2 \times 2$ | 384                     | 72                 |
| OXALAC03 | 114.8    | 112.1  | 112.7     | -994659.9        | $2 \times 2 \times 3$ | 384                     | 24                 |
| OXALAC04 | 114.5    | 110.2  | 112.1     | -994662.5        | $3 \times 2 \times 2$ | 192                     | 24                 |
| QQQCIV01 | 107.3    | 104.6  | 104.9     | -348883.8        | $3 \times 2 \times 2$ | 288                     | 36                 |
| QQQCIV08 | 109.7    | 104.8  | 105.7     | -348884.1        | $3 \times 3 \times 2$ | 216                     | 36                 |
| REKBUE   | 384.9    | 379.1  | 379.3     | -2088217.1       | $3 \times 2 \times 2$ | 528                     | 66                 |
| REKBUE01 | 387.9    | 378.5  | 378.6     | -2088220.9       | $4 \times 3 \times 1$ | 264                     | 66                 |
| SUCACB02 | 255.1    | 250.4  | 251.7     | -1201305.4       | $2 \times 1 \times 3$ | 168                     | 42                 |
| SUCACB07 | 253.6    | 248.8  | 250.4     | -1201305.9       | $3 \times 2 \times 3$ | 504                     | 84                 |
| THHYDT   | 186.8    | 183.8  | 183.5     | -1842418.6       | $3 \times 2 \times 3$ | 792                     | 66                 |
| THHYDT02 | 187.7    | 182.5  | 182.4     | -1842421.0       | $3 \times 2 \times 2$ | 264                     | 66                 |
| TRDMPP01 | 406.6    | 401.1  | 401.2     | -1300118.3       | $2 \times 3 \times 2$ | 480                     | 60                 |
| TRDMPP02 | 406.4    | 400.8  | 401.6     | -1300118.8       | $2 \times 2 \times 2$ | 320                     | 60                 |
| TRITAN03 | 204.5    | 201.3  | 202.0     | -3459800.9       | $3 \times 2 \times 1$ | 288                     | 40                 |
| TRITAN10 | 207.6    | 201.8  | 202.2     | -3459801.3       | $2 \times 2 \times 3$ | 288                     | 40                 |
| XOCJEE   | 211.8    | 206.4  | 207.2     | -2085230.8       | $3 \times 2 \times 4$ | 624                     | 78                 |
| XOCJEE01 | 212.1    | 206.8  | 206.7     | -2085230.2       | $2 \times 2 \times 3$ | 312                     | 78                 |

TABLE II. Vibrational free energies and DFT lattice energies, in kJ/mol per molecule, for the CSP blind-test compound XX. Supercell dimensions represent the number of times the unit cell is replicated along the  $a$ ,  $b$ , and  $c$  lattice vectors.

| Structure     | $\Gamma$ | ED     | Converged | $E_{\text{DFT}}$ | Supercell dimensions  | # of atoms in supercell | # of displacements |
|---------------|----------|--------|-----------|------------------|-----------------------|-------------------------|--------------------|
| xx-day-2      | 1013.8   | 1005.7 | 1005.0    | -5716928.9       | $2 \times 1 \times 2$ | 440                     | 330                |
| xx-expt       | 1001.7   | 997.2  | 997.5     | -5716931.1       | $2 \times 4 \times 1$ | 1760                    | 330                |
| xx-kendrick-1 | 1007.2   | 1003.6 | 1006.2    | -5716929.3       | $3 \times 1 \times 1$ | 660                     | 660                |
| xx-kendrick-2 | 1009.2   | 1004.9 | 1004.0    | -5716935.4       | $4 \times 1 \times 1$ | 880                     | 330                |
| xx-kendrick-3 | 1011.4   | 1002.8 | 1002.9    | -5716935.5       | $2 \times 3 \times 2$ | 1320                    | 330                |
| xx-price-2    | 1007.7   | 1003.1 | 1002.5    | -5716937.7       | $2 \times 2 \times 2$ | 1760                    | 330                |

TABLE III. Vibrational free energies and DFT lattice energies, in kJ/mol per molecule, for the CSP blind-test compound XXIII. Supercell dimensions represent the number of times the unit cell is replicated along the  $a$ ,  $b$ , and  $c$  lattice vectors.

| Structure              | $\Gamma$ | ED    | Converged | $E_{\text{DFT}}$ | Supercell dimensions  | # of atoms in<br>supercell | # of displacements |
|------------------------|----------|-------|-----------|------------------|-----------------------|----------------------------|--------------------|
| xxiii-003              | 787.5    | 783.9 | 786.8     | -5097443.1       | $3 \times 1 \times 1$ | 516                        | 516                |
| xxiii-005              | 791.7    | 787.6 | 788.3     | -5097443.6       | $3 \times 2 \times 1$ | 1032                       | 516                |
| xxiii-007              | 790.3    | 786.2 | 785.8     | -5097442.4       | $3 \times 2 \times 1$ | 1032                       | 516                |
| xxiii-008              | 788.1    | 785.6 | 786.7     | -5097442.5       | $3 \times 2 \times 1$ | 2064                       | 516                |
| xxiii-010              | 787.9    | 785.4 | 786.4     | -5097442.2       | $3 \times 2 \times 1$ | 2064                       | 516                |
| xxiii-011              | 791.8    | 787.5 | 788.6     | -5097443.1       | $2 \times 2 \times 1$ | 688                        | 516                |
| xxiii-013              | 787.0    | 784.6 | 785.8     | -5097442.0       | $3 \times 2 \times 1$ | 2064                       | 516                |
| xxiii-018              | 794.7    | 786.8 | 787.3     | -5097442.9       | $2 \times 2 \times 2$ | 688                        | 258                |
| xxiii-020              | 783.6    | 781.7 | 785.6     | -5097442.1       | $4 \times 1 \times 1$ | 1376                       | 516                |
| xxiii-021              | 788.1    | 785.8 | 786.7     | -5097441.7       | $3 \times 2 \times 1$ | 2064                       | 516                |
| xxiii-022              | 791.2    | 787.0 | 786.8     | -5097442.2       | $3 \times 2 \times 1$ | 1032                       | 516                |
| xxiii-023              | 783.7    | 781.8 | 785.7     | -5097442.0       | $4 \times 1 \times 1$ | 1376                       | 516                |
| xxiii-024              | 788.5    | 786.2 | 786.8     | -5097442.6       | $3 \times 2 \times 1$ | 2064                       | 516                |
| xxiii-025              | 791.4    | 787.4 | 788.4     | -5097441.3       | $2 \times 2 \times 1$ | 688                        | 516                |
| xxiii-026              | 785.8    | 783.8 | 786.6     | -5097442.4       | $3 \times 2 \times 1$ | 2064                       | 516                |
| xxiii-029              | 788.4    | 786.1 | 786.8     | -5097440.8       | $4 \times 1 \times 1$ | 1376                       | 516                |
| xxiii-030              | 791.6    | 787.5 | 788.3     | -5097441.0       | $2 \times 2 \times 1$ | 688                        | 516                |
| xxiii-033              | 789.9    | 785.7 | 785.8     | -5097441.0       | $3 \times 2 \times 1$ | 1032                       | 516                |
| xxiii-036              | 789.8    | 785.7 | 785.4     | -5097441.0       | $3 \times 2 \times 1$ | 1032                       | 516                |
| xxiii-038              | 790.1    | 785.6 | 785.8     | -5097441.8       | $3 \times 2 \times 1$ | 1032                       | 258                |
| xxiii-040              | 789.7    | 785.4 | 785.1     | -5097440.1       | $3 \times 2 \times 1$ | 1032                       | 516                |
| xxiii-042              | 794.9    | 787.0 | 787.3     | -5097441.0       | $3 \times 2 \times 1$ | 516                        | 258                |
| xxiii-043              | 791.5    | 787.3 | 787.5     | -5097440.5       | $2 \times 2 \times 2$ | 1376                       | 258                |
| xxiii-044              | 793.2    | 788.7 | 786.9     | -5097440.8       | $3 \times 2 \times 1$ | 1032                       | 516                |
| xxiii-046              | 789.8    | 785.4 | 785.4     | -5097440.6       | $2 \times 2 \times 2$ | 1376                       | 516                |
| xxiii-047              | 790.8    | 786.6 | 785.9     | -5097440.6       | $3 \times 2 \times 1$ | 1032                       | 516                |
| xxiii-048              | 789.5    | 785.6 | 789.2     | -5097441.0       | $4 \times 1 \times 1$ | 688                        | 258                |
| xxiii-049              | 795.8    | 787.5 | 787.0     | -5097440.2       | $2 \times 2 \times 2$ | 688                        | 258                |
| xxiii-052              | 790.7    | 786.7 | 785.8     | -5097440.6       | $3 \times 2 \times 1$ | 1032                       | 516                |
| xxiii-053              | 793.7    | 786.2 | 785.1     | -5097441.5       | $3 \times 2 \times 1$ | 516                        | 258                |
| xxiii-057              | 789.6    | 785.4 | 785.7     | -5097440.5       | $3 \times 2 \times 1$ | 1032                       | 516                |
| xxiii-059              | 790.2    | 786.1 | 785.7     | -5097440.6       | $3 \times 2 \times 1$ | 1032                       | 516                |
| xxiii-060              | 790.5    | 786.3 | 786.0     | -5097440.6       | $3 \times 2 \times 1$ | 1032                       | 516                |
| xxiii-063              | 788.9    | 785.3 | 787.1     | -5097440.6       | $3 \times 2 \times 1$ | 1032                       | 516                |
| xxiii-065              | 789.4    | 785.4 | 786.6     | -5097440.5       | $3 \times 2 \times 1$ | 1032                       | 516                |
| xxiii-067              | 788.1    | 784.5 | 785.8     | -5097440.8       | $3 \times 2 \times 1$ | 1032                       | 516                |
| xxiii-068              | 790.6    | 786.4 | 787.6     | -5097440.4       | $3 \times 2 \times 1$ | 1032                       | 258                |
| xxiii-070              | 788.5    | 784.2 | 784.1     | -5097443.4       | $2 \times 2 \times 1$ | 688                        | 258                |
| xxiii-080              | 788.5    | 784.5 | 786.1     | -5097440.8       | $3 \times 2 \times 1$ | 1032                       | 258                |
| xxiii-083              | 787.2    | 783.6 | 786.3     | -5097439.6       | $4 \times 1 \times 1$ | 688                        | 516                |
| xxiii-091              | 793.8    | 786.0 | 786.6     | -5097440.2       | $3 \times 2 \times 1$ | 516                        | 258                |
| xxiii-095              | 793.7    | 786.4 | 786.2     | -5097440.4       | $3 \times 2 \times 1$ | 516                        | 258                |
| xxiii-097              | 788.6    | 784.4 | 784.7     | -5097440.5       | $3 \times 2 \times 1$ | 1032                       | 516                |
| xxiii-100              | 789.1    | 784.9 | 786.5     | -5097440.4       | $3 \times 2 \times 1$ | 1032                       | 258                |
| xxiii-boese-hofmann1-1 | 797.0    | 789.4 | 788.5     | -5097441.1       | $2 \times 2 \times 2$ | 688                        | 258                |
| xxiii-expt-a           | 787.7    | 783.1 | 783.4     | -5097443.1       | $2 \times 2 \times 1$ | 688                        | 258                |
| xxiii-expt-b           | 794.6    | 787.4 | 787.0     | -5097444.0       | $3 \times 2 \times 1$ | 516                        | 258                |
| xxiii-expt-c           | 791.7    | 787.6 | 788.3     | -5097443.6       | $2 \times 2 \times 1$ | 688                        | 516                |
| xxiii-expt-d           | 788.1    | 783.6 | 783.5     | -5097443.0       | $1 \times 2 \times 2$ | 688                        | 516                |
| xxiii-expt-e           | 789.3    | 785.2 | 785.1     | -5097442.9       | $3 \times 1 \times 1$ | 516                        | 516                |
| xxiii-neumann1-3       | 795.3    | 787.3 | 787.4     | -5097443.2       | $2 \times 2 \times 2$ | 688                        | 258                |
| xxiii-neumann2-1       | 787.8    | 785.5 | 786.6     | -5097443.5       | $1 \times 3 \times 1$ | 1032                       | 516                |
| xxiii-neumann2-2       | 791.0    | 786.9 | 786.8     | -5097444.9       | $3 \times 2 \times 1$ | 1032                       | 516                |
| xxiii-poly59-23-1      | 794.5    | 787.0 | 787.6     | -5097441.1       | $1 \times 2 \times 3$ | 516                        | 258                |
| xxiii-poly59-23-2      | 795.4    | 789.3 | 788.3     | -5097440.7       | $3 \times 1 \times 2$ | 516                        | 258                |
| xxiii-tkatchenko2-1    | 792.5    | 785.2 | 784.9     | -5097441.8       | $3 \times 2 \times 1$ | 516                        | 258                |
| xxiii-vaneijk1-1       | 789.1    | 782.1 | 784.8     | -5097441.8       | $4 \times 1 \times 1$ | 344                        | 258                |

TABLE IV. Vibrational free energies and DFT lattice energies, in kJ/mol per molecule, for the CSP blind-test compound XXXI. Supercell dimensions represent the number of times the unit cell is replicated along the  $a$ ,  $b$ , and  $c$  lattice vectors.

| Structure | $\Gamma$ | ED    | Converged | $E_{\text{DFT}}$ | Supercell dimensions  | # of atoms in supercell | # of displacements |
|-----------|----------|-------|-----------|------------------|-----------------------|-------------------------|--------------------|
| XXXI-1    | 535.6    | 531.5 | 532.0     | -3795199.5       | $3 \times 2 \times 1$ | 768                     | 192                |
| XXXI-10   | 533.5    | 531.2 | 531.6     | -3795196.6       | $3 \times 2 \times 1$ | 1536                    | 192                |
| XXXI-11   | 536.0    | 531.9 | 533.2     | -3795199.8       | $3 \times 3 \times 1$ | 1152                    | 192                |
| XXXI-17   | 537.8    | 533.5 | 534.0     | -3795202.0       | $4 \times 1 \times 1$ | 512                     | 192                |
| XXXI-18   | 534.9    | 530.6 | 531.1     | -3795197.4       | $3 \times 2 \times 1$ | 768                     | 192                |
| XXXI-20   | 535.4    | 531.0 | 530.9     | -3795198.3       | $2 \times 2 \times 2$ | 1024                    | 192                |
| XXXI-21   | 535.0    | 530.9 | 532.1     | -3795196.3       | $3 \times 2 \times 1$ | 768                     | 192                |
| XXXI-22   | 536.6    | 532.4 | 532.6     | -3795197.2       | $3 \times 2 \times 1$ | 768                     | 192                |
| XXXI-23   | 541.2    | 533.6 | 533.6     | -3795198.0       | $3 \times 2 \times 1$ | 384                     | 192                |
| XXXI-24   | 532.4    | 528.5 | 531.0     | -3795197.4       | $2 \times 3 \times 1$ | 768                     | 192                |
| XXXI-25   | 532.7    | 528.3 | 529.1     | -3795197.9       | $3 \times 2 \times 1$ | 768                     | 192                |
| XXXI-28   | 538.5    | 530.8 | 532.6     | -3795199.5       | $3 \times 2 \times 1$ | 384                     | 192                |
| XXXI-30   | 541.3    | 533.5 | 534.2     | -3795198.0       | $3 \times 2 \times 1$ | 384                     | 192                |
| XXXI-32   | 536.0    | 532.0 | 532.8     | -3795199.0       | $4 \times 2 \times 1$ | 1024                    | 192                |
| XXXI-34   | 540.3    | 532.4 | 532.4     | -3795199.4       | $3 \times 3 \times 1$ | 576                     | 192                |
| XXXI-39   | 538.1    | 533.6 | 533.5     | -3795196.8       | $2 \times 2 \times 2$ | 1024                    | 192                |
| XXXI-41   | 543.0    | 535.2 | 536.1     | -3795197.0       | $3 \times 2 \times 1$ | 384                     | 192                |
| XXXI-53   | 539.7    | 532.1 | 532.6     | -3795196.4       | $3 \times 2 \times 1$ | 384                     | 192                |
| XXXI-57   | 536.5    | 532.2 | 533.2     | -3795198.7       | $3 \times 2 \times 1$ | 768                     | 192                |
| XXXI-63   | 537.7    | 533.2 | 532.8     | -3795197.6       | $3 \times 3 \times 2$ | 2304                    | 192                |
| XXXI-70   | 537.8    | 533.3 | 533.5     | -3795197.6       | $3 \times 2 \times 1$ | 768                     | 192                |
| XXXI-71   | 537.4    | 533.1 | 534.3     | -3795201.9       | $4 \times 1 \times 1$ | 512                     | 192                |
| XXXI-73   | 536.0    | 532.0 | 532.7     | -3795199.2       | $4 \times 2 \times 1$ | 1024                    | 192                |
| XXXI-75   | 538.1    | 530.4 | 531.7     | -3795197.7       | $3 \times 2 \times 1$ | 384                     | 192                |
| XXXI-77   | 537.0    | 532.5 | 532.8     | -3795197.4       | $2 \times 2 \times 2$ | 1024                    | 192                |
| XXXI-98   | 535.6    | 531.4 | 532.6     | -3795200.9       | $3 \times 2 \times 1$ | 768                     | 192                |
| XXXI-99   | 535.3    | 531.3 | 532.6     | -3795196.9       | $3 \times 2 \times 1$ | 768                     | 192                |

TABLE V. Vibrational free energies and DFT lattice energies, in kJ/mol per molecule, for the CSP blind-test compound XXXII. Supercell dimensions represent the number of times the unit cell is replicated along the  $a$ ,  $b$ , and  $c$  lattice vectors.

| Structure | $\Gamma$ | ED     | Converged | $E_{\text{DFT}}$ | Supercell dimensions  | # of atoms in supercell | # of displacements |
|-----------|----------|--------|-----------|------------------|-----------------------|-------------------------|--------------------|
| XXXII-7   | 1444.2   | 1439.8 | 1440.7    | -6471784.6       | $3 \times 1 \times 1$ | 912                     | 456                |
| XXXII-9   | 1450.2   | 1441.9 | 1441.0    | -6471788.6       | $2 \times 2 \times 2$ | 1216                    | 456                |
| XXXII-57  | 1451.0   | 1442.3 | 1441.5    | -6471783.0       | $2 \times 2 \times 1$ | 608                     | 456                |
| XXXII-82  | 1450.5   | 1442.0 | 1441.4    | -6471784.5       | $2 \times 2 \times 2$ | 1216                    | 456                |
| XXXII-114 | 1446.4   | 1441.9 | 1441.9    | -6471782.4       | $3 \times 1 \times 1$ | 912                     | 456                |
| XXXII-117 | 1451.0   | 1443.0 | 1444.4    | -6471784.1       | $2 \times 2 \times 1$ | 608                     | 456                |
| XXXII-130 | 1444.9   | 1439.9 | 1440.7    | -6471782.4       | $2 \times 2 \times 1$ | 1216                    | 912                |
| XXXII-140 | 1453.6   | 1445.8 | 1445.3    | -6471782.2       | $2 \times 2 \times 1$ | 608                     | 456                |
| XXXII-165 | 1447.7   | 1443.5 | 1443.5    | -6471786.1       | $2 \times 2 \times 1$ | 1216                    | 456                |
| XXXII-193 | 1445.1   | 1440.8 | 1443.0    | -6471784.2       | $3 \times 2 \times 1$ | 1824                    | 456                |
| XXXII-199 | 1443.2   | 1438.8 | 1440.1    | -6471782.9       | $3 \times 1 \times 1$ | 912                     | 456                |
| XXXII-232 | 1443.5   | 1439.1 | 1439.4    | -6471783.0       | $2 \times 2 \times 1$ | 1216                    | 912                |
| XXXII-236 | 1451.7   | 1443.6 | 1442.8    | -6471783.0       | $2 \times 2 \times 1$ | 608                     | 456                |
| XXXII-250 | 1449.8   | 1441.7 | 1442.4    | -6471784.0       | $3 \times 2 \times 1$ | 912                     | 456                |
| XXXII-270 | 1445.5   | 1440.8 | 1440.8    | -6471787.5       | $2 \times 2 \times 1$ | 1216                    | 456                |
| XXXII-299 | 1449.8   | 1441.8 | 1442.5    | -6471784.8       | $3 \times 2 \times 1$ | 912                     | 456                |
| XXXII-317 | 1449.0   | 1440.2 | 1440.1    | -6471782.2       | $2 \times 2 \times 1$ | 608                     | 456                |
| XXXII-320 | 1450.0   | 1445.3 | 1445.2    | -6471786.9       | $2 \times 2 \times 1$ | 1216                    | 456                |
| XXXII-331 | 1450.4   | 1442.0 | 1441.8    | -6471782.7       | $2 \times 2 \times 1$ | 608                     | 456                |
| XXXII-334 | 1447.7   | 1443.1 | 1443.9    | -6471783.3       | $2 \times 2 \times 1$ | 1216                    | 456                |
| XXXII-342 | 1451.1   | 1442.7 | 1442.0    | -6471785.7       | $2 \times 2 \times 2$ | 1216                    | 456                |
| XXXII-388 | 1451.5   | 1447.2 | 1446.9    | -6471786.1       | $2 \times 2 \times 1$ | 1216                    | 456                |
| XXXII-423 | 1449.5   | 1445.0 | 1445.6    | -6471788.1       | $2 \times 2 \times 1$ | 1216                    | 456                |
| XXXII-448 | 1449.2   | 1444.8 | 1445.2    | -6471782.0       | $2 \times 2 \times 1$ | 1216                    | 456                |
| XXXII-478 | 1451.2   | 1442.5 | 1441.6    | -6471783.0       | $2 \times 1 \times 2$ | 608                     | 456                |
| XXXII-500 | 1449.8   | 1441.8 | 1442.9    | -6471787.9       | $3 \times 2 \times 1$ | 912                     | 456                |

TABLE VI. Vibrational free energies and DFT lattice energies, in kJ/mol per molecule, for the FP10 set of polymorph pairs.

| Refcode  | $\Gamma$ | ED     | $E_{\text{DFT}}$ |
|----------|----------|--------|------------------|
| BEDMIG   | 543.7    | 539.9  | -4167127.0       |
| BEDMIG01 | 539.0    | 536.6  | -4167124.3       |
| BEDMIG02 | 547.3    | 539.4  | -4167125.2       |
| BEDMIG03 | 541.4    | 539.2  | -4167125.1       |
| BEDMIG04 | 540.8    | 536.8  | -4167124.9       |
| BEDMIG20 | 542.3    | 537.9  | -4167122.7       |
| CIMETD   | 646.7    | 643.0  | -2940107.3       |
| CIMETD01 | 645.8    | 642.2  | -2940107.6       |
| FOGVIG01 | 627.3    | 623.5  | -5377747.5       |
| FOGVIG02 | 631.2    | 627.7  | -5377744.1       |
| GICKEM   | 962.0    | 953.3  | -6337341.8       |
| GICKEM01 | 962.4    | 954.9  | -6337345.1       |
| GICKEM02 | 961.6    | 957.1  | -6337347.8       |
| JAKGEH   | 749.7    | 743.1  | -2499275.0       |
| JAKGEH01 | 749.0    | 745.0  | -2499274.8       |
| MELFIT01 | 1135.2   | 1127.4 | -5601204.4       |
| MELFIT02 | 1131.4   | 1127.1 | -5601207.3       |
| MELFIT05 | 1139.6   | 1131.9 | -5601209.9       |
| MELFIT07 | 1140.5   | 1132.3 | -5601210.3       |
| MELFIT09 | 1132.6   | 1128.2 | -5601207.9       |
| POPFAC   | 852.8    | 849.1  | -3555132.8       |
| POPFAC01 | 849.8    | 847.6  | -3555131.8       |
| UGIVAI   | 596.7    | 591.0  | -2432541.6       |
| UGIVAI01 | 599.6    | 596.6  | -2432546.5       |
| ZZZPUS01 | 709.1    | 705.3  | -3161179.8       |
| ZZZPUS06 | 708.0    | 703.7  | -3161176.5       |
| ZZZPUS07 | 709.4    | 705.3  | -3161178.6       |
| ZZZPUS10 | 705.9    | 703.5  | -3161175.1       |
| INDMET02 | 745.9    | 743.1  | -4077003.3       |
| INDMET03 | 750.8    | 743.3  | -4077001.0       |
| INDMET07 | 747.4    | 743.2  | -4077002.6       |
| INDMET09 | 740.2    | 738.2  | -4076998.0       |

TABLE VII. Mean absolute errors in absolute and relative free-energy corrections at 0 K, in kJ/mol per molecule, relative to converged supercell results for the PV10 set and blind-test compounds.

| System | Gamma            |                         | Einstein-Debye   |                         |
|--------|------------------|-------------------------|------------------|-------------------------|
|        | $F_{\text{vib}}$ | $\Delta F_{\text{vib}}$ | $F_{\text{vib}}$ | $\Delta F_{\text{vib}}$ |
| PV17   | 0.74             | 0.32                    | 0.28             | 0.15                    |
| XXXI   | 0.21             | 0.10                    | 0.07             | 0.06                    |
| XXIII  | 0.19             | 0.11                    | 0.07             | 0.07                    |
| XXXII  | 0.33             | 0.11                    | 0.18             | 0.07                    |
| XX     | 0.12             | 0.16                    | 0.07             | 0.09                    |
